# Supplementary material
Source: PubMed Central journal article supplement (PMC2943314)
Supplement: supp_M110.127142_jbc.M110.127142-1.pdf [file supp_M110.127142_jbc.M110.127142-1.pdf]

Figure s1:

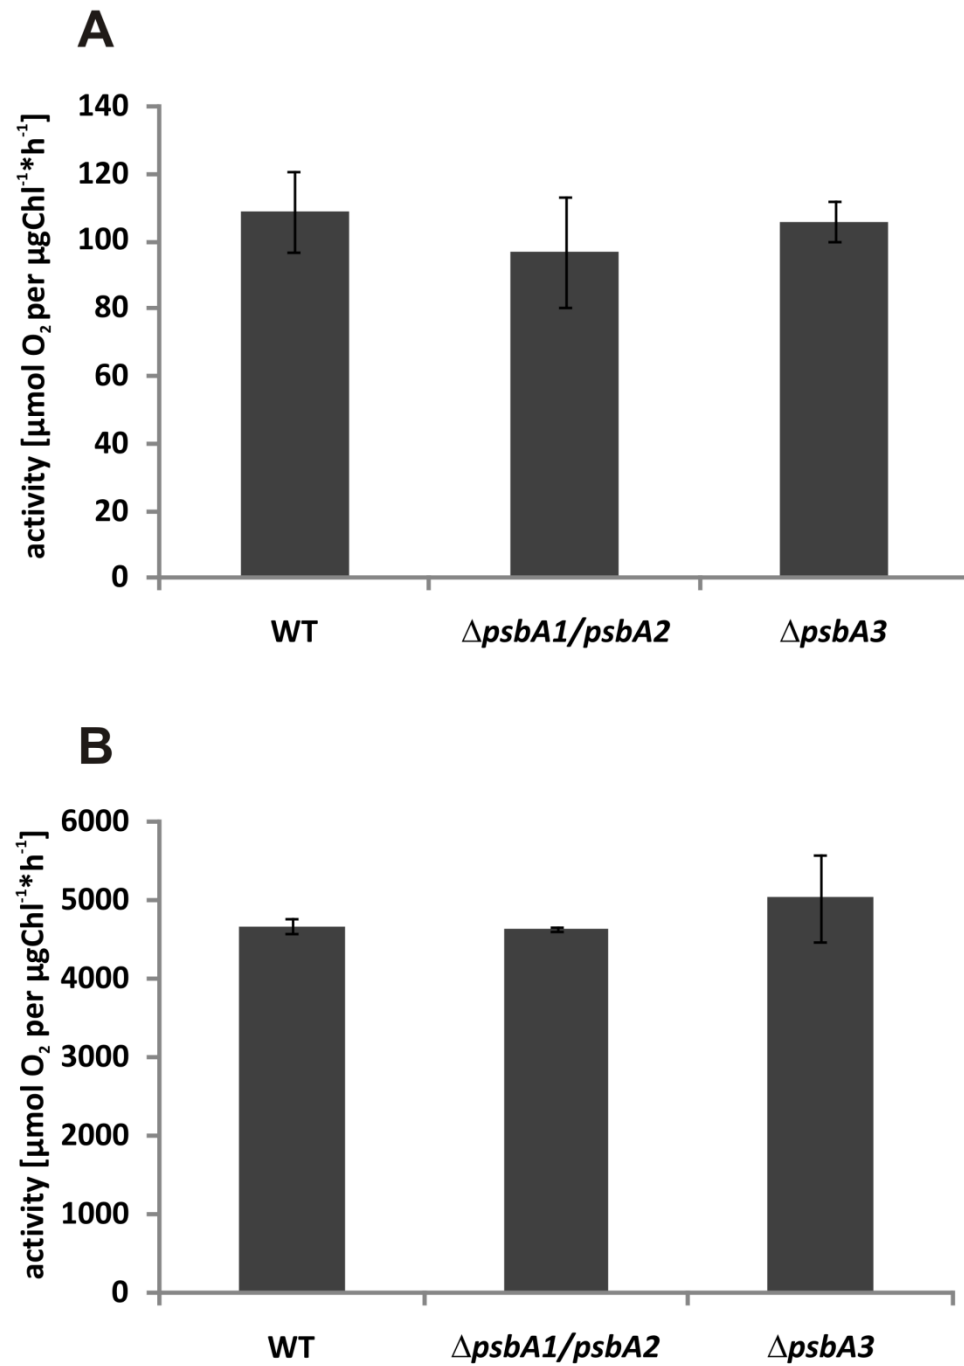

Figure s1: Oxygen evolving activity of whole cells (A) and isolated PSII complexes (B) of the WT,  $\Delta psbA3$  and  $\Delta psbA1/A2$  mutants, using continuous light of  $8000 \mu\text{E} \cdot \text{m}^{-2} \cdot \text{s}^{-1}$  intensity. Data are presented as mean  $\pm$  SD of 3 independent measurements.

Figure s2:

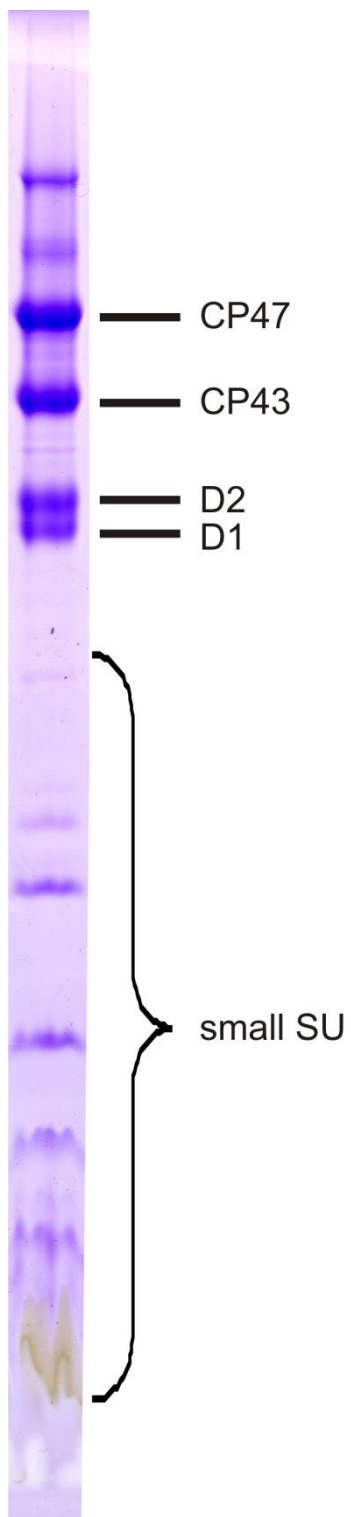

**Figure s2:** For the detection the D1-D2 area, a 12% PAGE containing 6M Urea and 0.1 % SDS was loaded with 1  $\mu\text{g}$  Chl of the previously mixed isolated PSII samples. Subsequently the region containing D1 and D2 was cut out of the gel and used for chymotrypsine digest, followed by ESI-MS/MS measurements.
